# Supplementary material for: ZnO quantum dots@covalent organic frameworks for high-performance alkaline zinc-based batteries
Source: Royal Society of Chemistry journal article supplement (doi:10.1039/d3ta05714c), 2023-01-01
Supplement: d3ta05714c1.pdf [file d3ta05714c1.pdf]

## Supporting information

# **ZnO quantum dots@ covalent organic frameworks for high-performance alkaline zinc-based batteries**

Jingbo Cai, Jianglin Wang, Xiao Yu, Yini Long, Zhanhong Yang\*

*Hunan Province Key Laboratory of Chemical Power Source, College of Chemistry and  
Chemical Engineering, Central South University, Changsha, 410083, China*

## Experimental Section

### Chemicals

All solvents and reagents obtained from commercial sources were used without further purification. Zinc acetate dihydrate ( $\text{Zn}(\text{CH}_3\text{COO})_2 \cdot 2\text{H}_2\text{O}$ , 99%, CAS 5970-45-6), lithium hydroxide monohydrate ( $\text{LiOH} \cdot \text{H}_2\text{O}$ , 99.95%, CAS 1310-66-3), ethanol ( $\text{CH}_3\text{CH}_2\text{OH}$ , 99.7%, CAS 64-17-5), 3-aminopropyltriethoxysilane (APTES, 99%, CAS 919-30-2), 2,4,6-trihydroxy-1,3,5-benzenetricarboxaldehyde (Tp, 97%, CAS 34374-88-4), p-Phenylenediamine (Pa-1, 99%, CAS 106-50-3), mesitylene ( $\text{C}_9\text{H}_{12}$ , 97%, CAS 108-67-8), acetic acid ( $\text{CH}_3\text{COOH}$ , 36%, CAS 64-19-7), N-N dimethylacetamide ( $\text{C}_3\text{H}_7\text{NO}$ , AR, CAS 127-19-5), acetone ( $\text{CH}_3\text{COCH}_3$ , 99.5%, 67-64-1) were obtained from Sinopharm Chemical Reagent.

### Computational details

The DFT calculation were carried out using the DMol<sub>3</sub> in Material Studio programs. The Perdew-Burke-Enzzhof (PBE) function in the generalized gradient approximation (GGA) method was used for the calculation. The Monkhorst-Pack network method is used to sample the Brillouin k-point in the reciprocal space, and the network size is  $3 \times 3 \times 1$ . The energy tolerance accuracy, the maximum force, and the displacement are set to  $1 \times 10^{-5}$  Ha,  $2 \times 10^{-3}$  Ha / Å, and  $5 \times 10^{-3}$  Å, respectively. The binding energies of  $\text{Zn}(\text{OH})_4^{2-}$  ions absorbed on TpPa-1 COF calculated by the equation (1):

$$E(\text{Zn}(\text{OH})_4^{2-} \text{ on TpPa-1 COF}) = E(\text{Zn}(\text{OH})_4^{2-} \text{ and TpPa-1 COF}) - E(\text{Zn}(\text{OH})_4^{2-}) - E(\text{TpPa-1 COF}) \quad (1)$$

where the  $E(\text{Zn}(\text{OH})_4^{2-} \text{ on TpPa-1 COF})$  represented the total energies of  $\text{Zn}(\text{OH})_4^{2-}$  ions adsorption on TpPa-1 COF.

And  $E(\text{Zn}(\text{OH})_4^{2-})$ ,  $E(\text{TpPa-1 COF})$  were the energies of  $\text{Zn}(\text{OH})_4^{2-}$  ion and TpPa-1 COF alone, respectively.

Charge density difference distribution of  $\text{Zn}(\text{OH})_4^{2-}$  on TpPa-1 COF was calculated by the equation (2):

$$\Delta\rho = \rho(\text{Zn}(\text{OH})_4^{2-} @\text{TpPa-1 COF}) - \rho(\text{Zn}(\text{OH})_4^{2-}) - \rho(\text{TpPa-1 COF}) \quad (2)$$

where  $\rho(\text{Zn}(\text{OH})_4^{2-} @\text{TpPa-1 COF})$ ,  $\rho(\text{Zn}(\text{OH})_4^{2-})$ , and  $\rho(\text{TpPa-1 COF})$  was the charge density distribution of  $\text{Zn}(\text{OH})_4^{2-}@\text{TpPa-1 COF}$ ,  $\text{Zn}(\text{OH})_4^{2-}$ , and TpPa-1 COF alone, respectively.

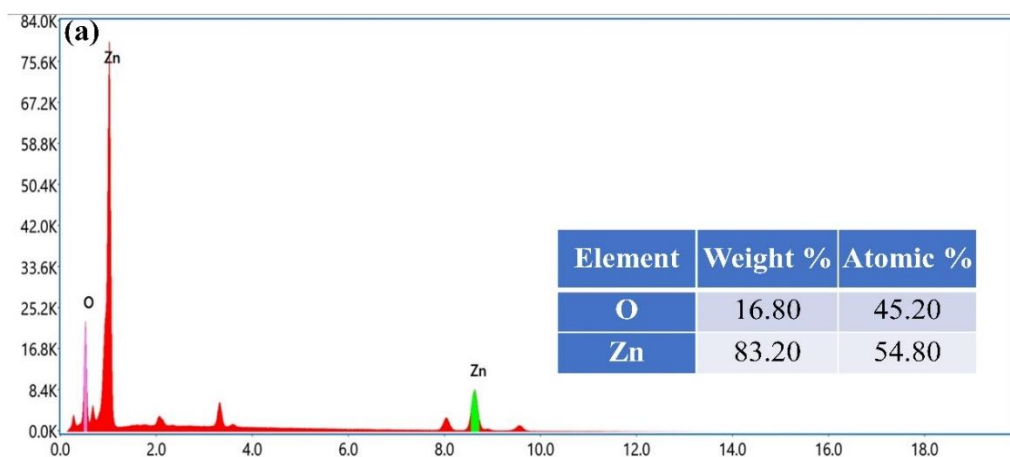

**Fig. S1** The content of Zn and O in ZnO QDs.

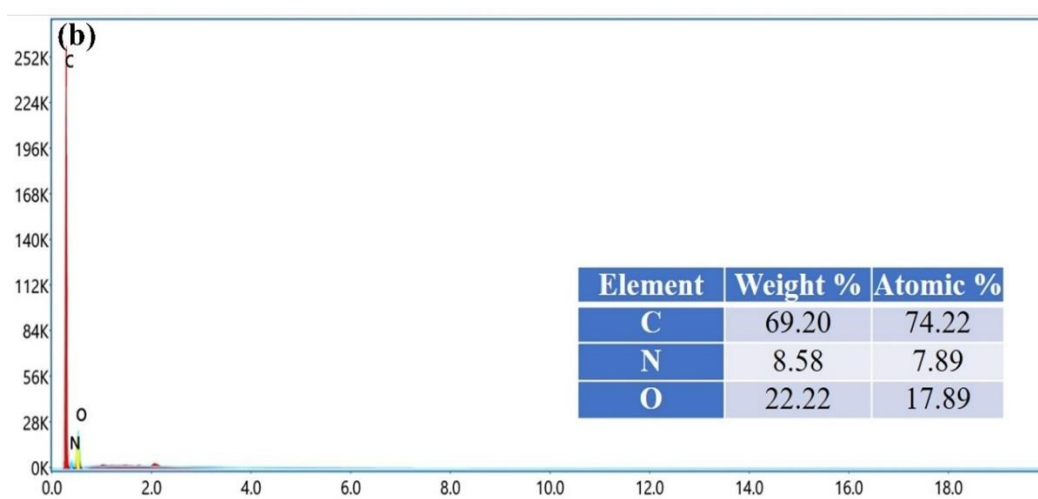

**Fig. S2** The content of C, N and O in TpPa-1 COF.

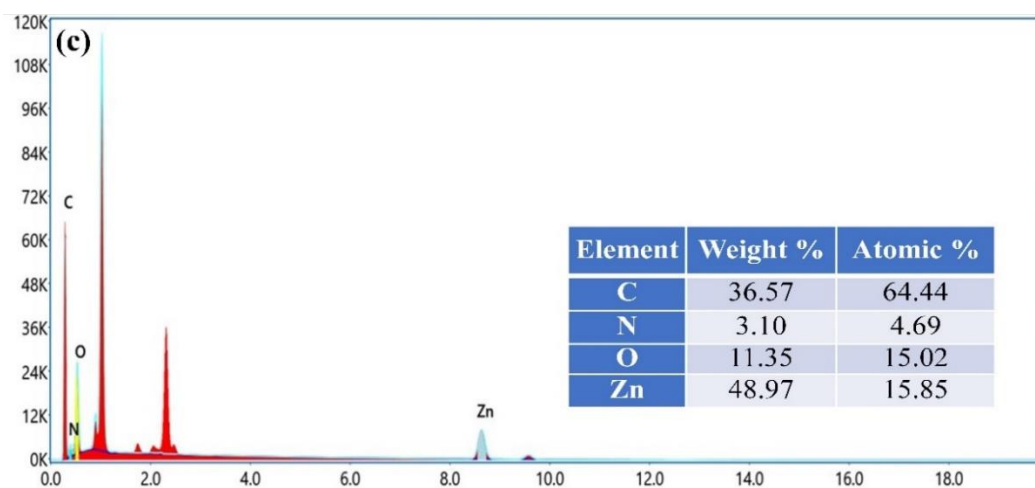

**Fig. S3** The content of Zn, C, N and O in ZnO QDs@TpPa-1 COF.

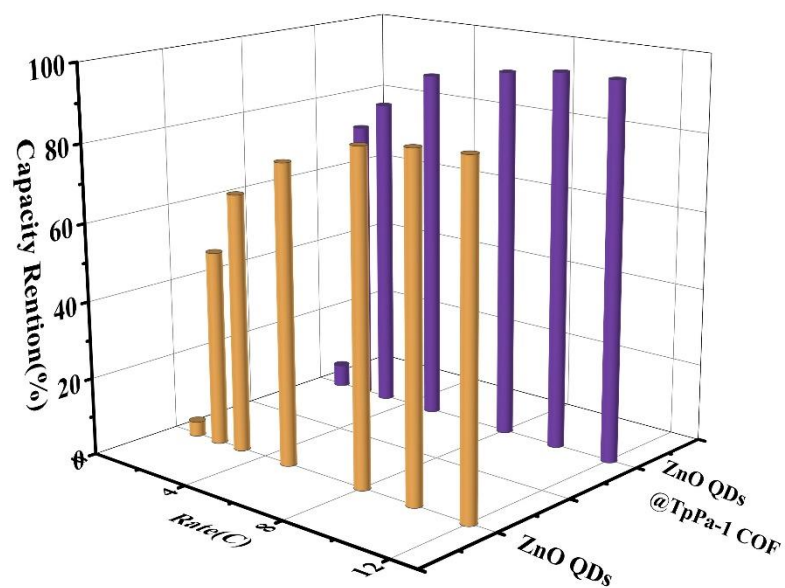

**Fig. S4** Discharge capacity retention at different rates.

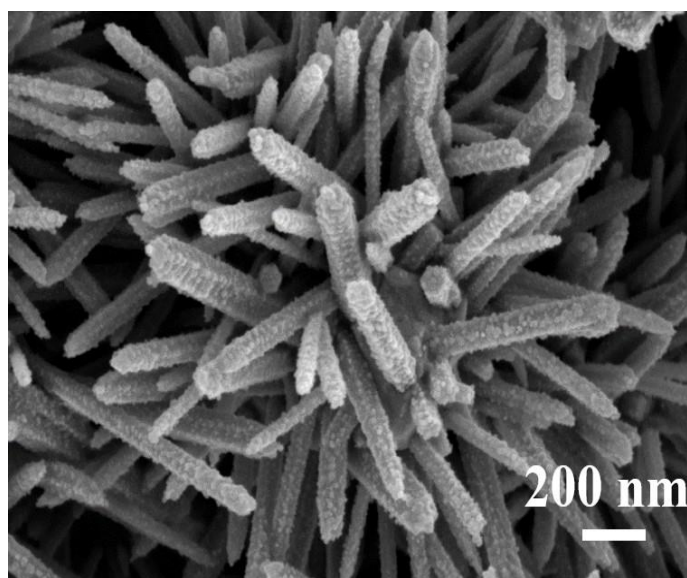

**Fig. S5** SEM image of commercial ZnO electrodes after 600 cycles.

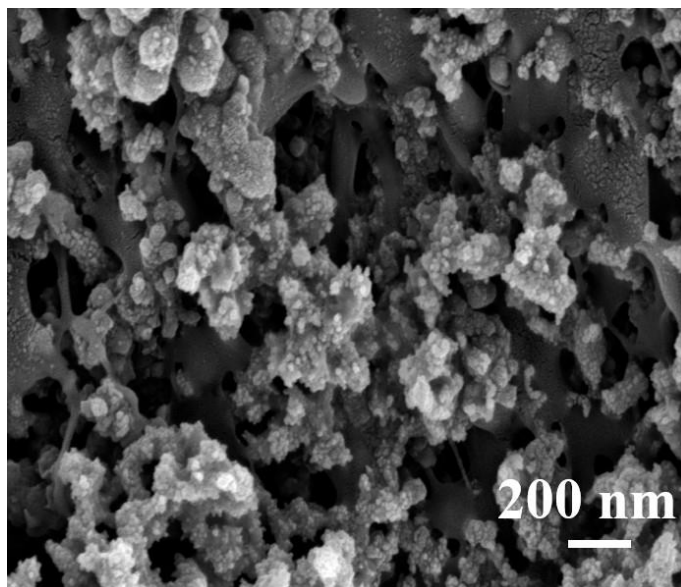

**Fig. S6** SEM image of ZnO QDs electrodes after 600 cycles.

**Table S1.** The peak and peak difference of oxidation and reduction peaks of commercial ZnO, ZnO QDs and ZnO QDs@TpPa-1COF at 10 mV s<sup>-1</sup>.

| Samples           | Oxidation peak(V) | Reduction peak (V) | peak difference (V) |
|-------------------|-------------------|--------------------|---------------------|
| Commercial ZnO    | -1.165            | -1.542             | 0.377               |
| ZnO QDs           | -1.156            | -1.529             | 0.373               |
| ZnO QDs@TpPa-1COF | -1.19             | -1.536             | 0.346               |

**Table S2.** Corrosion current corrosion voltage parameters of in ZnO, ZnO QDs and ZnO QDs@TpPa-1COF Talfe test.

| Samples                                   | Commercial ZnO          | ZnO QDs                 | ZnO QDs@TpPa-1COF       |
|-------------------------------------------|-------------------------|-------------------------|-------------------------|
| E <sub>corr</sub> /(V vs. Hg/HgO)         | -1.395                  | -1.382                  | -1.339                  |
| I <sub>corr</sub> /(mA·cm <sup>-2</sup> ) | 6.699× 10 <sup>-2</sup> | 2.058× 10 <sup>-2</sup> | 1.126× 10 <sup>-2</sup> |

**Table S3.** Parameters of in ZnO, ZnO QDs and ZnO QDs@TpPa-1COF EIS test.

| Samples           | Initial                          |                                   | After 200 th                     |                                   |
|-------------------|----------------------------------|-----------------------------------|----------------------------------|-----------------------------------|
|                   | <sup>a</sup> R <sub>s</sub> /(Ω) | <sup>b</sup> R <sub>ct</sub> /(Ω) | <sup>a</sup> R <sub>s</sub> /(Ω) | <sup>b</sup> R <sub>ct</sub> /(Ω) |
| Commercial ZnO    | 0.61936                          | 6.988                             | 0.62577                          | 22.13                             |
| ZnO QDs           | 0.55218                          | 1.914                             | 0.59274                          | 3.112                             |
| ZnO QDs@TpPa-1COF | 0.33931                          | 0.2225                            | 0.53925                          | 0.81752                           |

<sup>a</sup>R<sub>s</sub>, internal resistance or equivalent series resistance.

<sup>b</sup>R<sub>ct</sub>, charger-transfer resistance.

Related equivalent circuit.

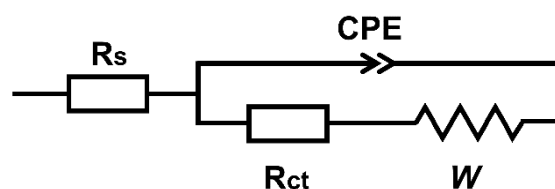**Table S4.** The comparison for performances of the zinc–nickel battery based on ZnO QDs@TpPa-1COF electrode in this work with that in previous research

| Anode material                      | Cycle life | Specific capacity (mAh g <sup>-1</sup> ) | Rate(C) | Ref. |
|-------------------------------------|------------|------------------------------------------|---------|------|
| ZnO@MXene                           | 1500       | 625                                      | 10 C    | 1    |
| ZnO@SnO <sub>2</sub>                | 1000       | 584                                      | 10 C    | 2    |
| ZnO@rGO                             | 1700       | 550                                      | 10 C    | 3    |
| ZnO <sub>1-x</sub>                  | 2000       | 612                                      | 10 C    | 4    |
| ZnSe @ZnO                           | 1460       | 577.5                                    | 10 C    | 5    |
| CeO <sub>2</sub> @ZnO               | 50         | 543                                      | 5 C     | 6    |
| ZnO@CaC <sub>2</sub> O <sub>4</sub> | 2100       | 570.7                                    | 10 C    | 7    |
| This work                           | 4000       | 576                                      | 12 C    |      |

## References

1. L. Yuan, J. Cai, J. Xu, Z. Yang, H. Liang, Q. Su and J. Wang, *Chem. Eng. J.*, 2023, **451**, 139073.
2. J. Xu, L. Yuan, Z. Yang, H. Liang, S. Li and J. Wang, *Ind. Eng. Chem. Res.*, 2022, **61**, 10650-10659.
3. L. Sun, Z. Yi, J. Lin, F. Liang, Y. Wu, Z. Cao and L. Wang, *J Phy. Chem. C*, 2016, **120**, 12337-12343.

4. J. Cai, L. Yuan, H. Liang, J. Xu, J. Wu, Z. Luo and Z. Yang, *Ind. Eng. Chem. Res.*, 2023, **62**, 12482-12490.
5. J. Xu, H. Liang, J. Cai, J. Wang, J. Wu, S. Li and Z. Yang, *Chem. Eng. Sci.*, 2023, **281**, 119222.
6. X. Fan, Z. Yang, W. Long, B. Yang, J. Jing and R. Wang, *Electrochim. Acta*, 2013, **108**, 741-748.
7. S. Li, Z. Yang, H. Liang, J. Wu, J. Xu and J. Wang, *Chem. Eng. Sci.*, 2023, **281**, 119199.
